# Supplementary material for: A Specific microRNA Targets an Elongase of Very Long Chain Fatty Acids to Regulate Fatty Acid Composition and Mitochondrial Morphology of Skeletal Muscle Cells
Source: MDPI journal article supplement (doi:10.3390/ani12172274), 2022-09-02
Supplement: s1 [file s1]

# Supplementary Material

Table S1 –Sequence of RNA Oligonucleotides

| Name                 | Forward (5'-3')          | Reverse (5'-3')         |
|----------------------|--------------------------|-------------------------|
| RNA oligonucleotides |                          |                         |
| Negative control     | UUCUCCGAACGUGUCACGUdTdT  | ACGUGACACGUUCGGAGAAdTdT |
| miR-22-mimics        | AAGCUGCCAGUUGAAGAACUGU   | AGUUCUUAACUGGCAGCUUUU   |
| miR-22-inhibitor     | CAGUUCUUAACUGGCAGCUU     |                         |
| Inhibitor NC         | UCUACUCUUUCUAGGAGGUUGUGA |                         |
